# Supplementary material
Source: PubMed Central journal article supplement (PMC9654597)
Supplement: NIHMS1846522-supplement-Supplementary_Figures.pdf [file NIHMS1846522-supplement-Supplementary_Figures.pdf]

**a**

| Cell line | Cells with $\geq 1$ counts for most abundant mapped read* | Cells with $\geq 2$ counts for most abundant mapped read* | NFkB screen published | Notes                                               | Recommended                           |
|-----------|-----------------------------------------------------------|-----------------------------------------------------------|-----------------------|-----------------------------------------------------|---------------------------------------|
| HeLa      | 94%                                                       | 89.0%                                                     | yes                   |                                                     | yes                                   |
| A549      | -                                                         | -                                                         | yes                   |                                                     | yes                                   |
| A375      | 92.8%                                                     | 86.3%                                                     |                       |                                                     | yes                                   |
| HT1080    | 91.8%                                                     | 91.0%                                                     |                       |                                                     | yes                                   |
| U2-OS     | 91.8%                                                     | 84.7%                                                     |                       | large surface area reduces cell throughput          | yes                                   |
| HCT116    | 95.5%                                                     | 91.6%                                                     | yes                   | cells tend to clump                                 | only if required by phenotyping assay |
| HEK293    | 93.2%                                                     | 79.3%                                                     |                       | high background staining, low sequencing spot count | only if required by phenotyping assay |
| THP-1     | -                                                         | -                                                         |                       | low sequencing spot count                           | no                                    |

\*cell lines compared in the same experiment on a single plate, mean of 2 replicate wells with 4 cycles of sequencing, 10 sgRNAs in the CROPseq vector

**b**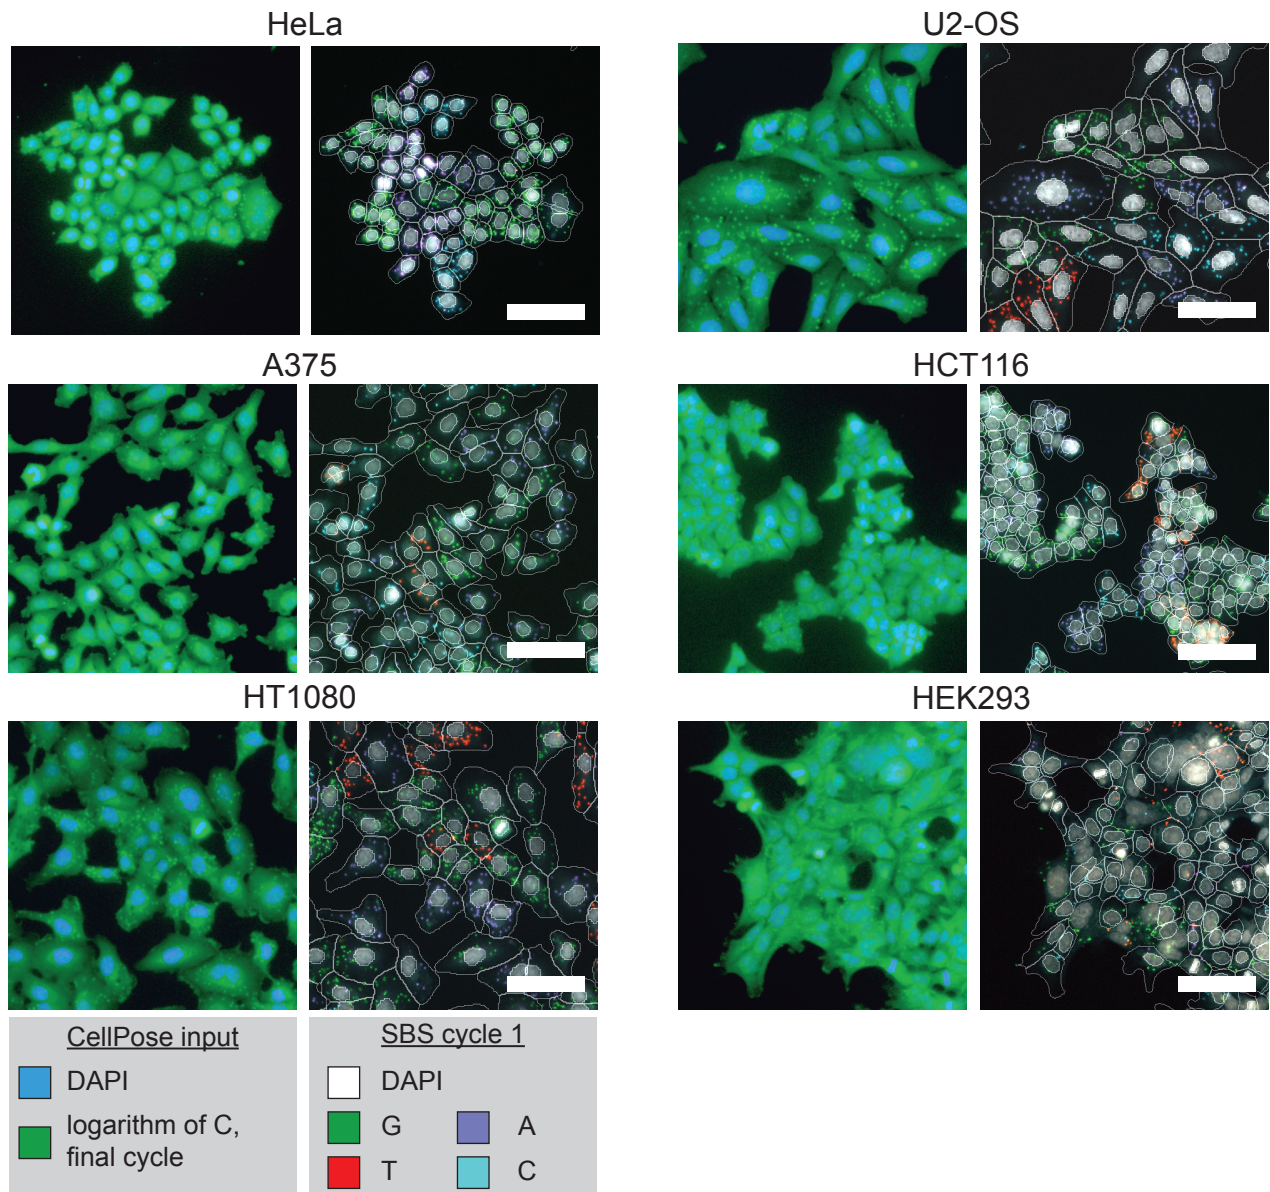

**Supplementary Figure 1.** Cell line comparison. (a) Suitability of example cell lines for optical pooled screening. NFkB screens were published in ref.<sup>43</sup> (b) Example cell and nuclear segmentation using CellPose, a generalist algorithm based on a deep learning model trained on diverse cell and image types. For each cell line, the left panel shows the exact RGB input provided to CellPose, and the right panel shows segmentations using the “cyto” and “nuclei” models in single-model mode (scale bar, 100  $\mu\text{m}$ ). All cell lines were analyzed identically, varying only in a single “diameter” parameter automatically generated by the CellPose “cyto” calibration model. Segmentation of a 1.2mm x 1.2mm field of view took ~4 min on 1 CPU.

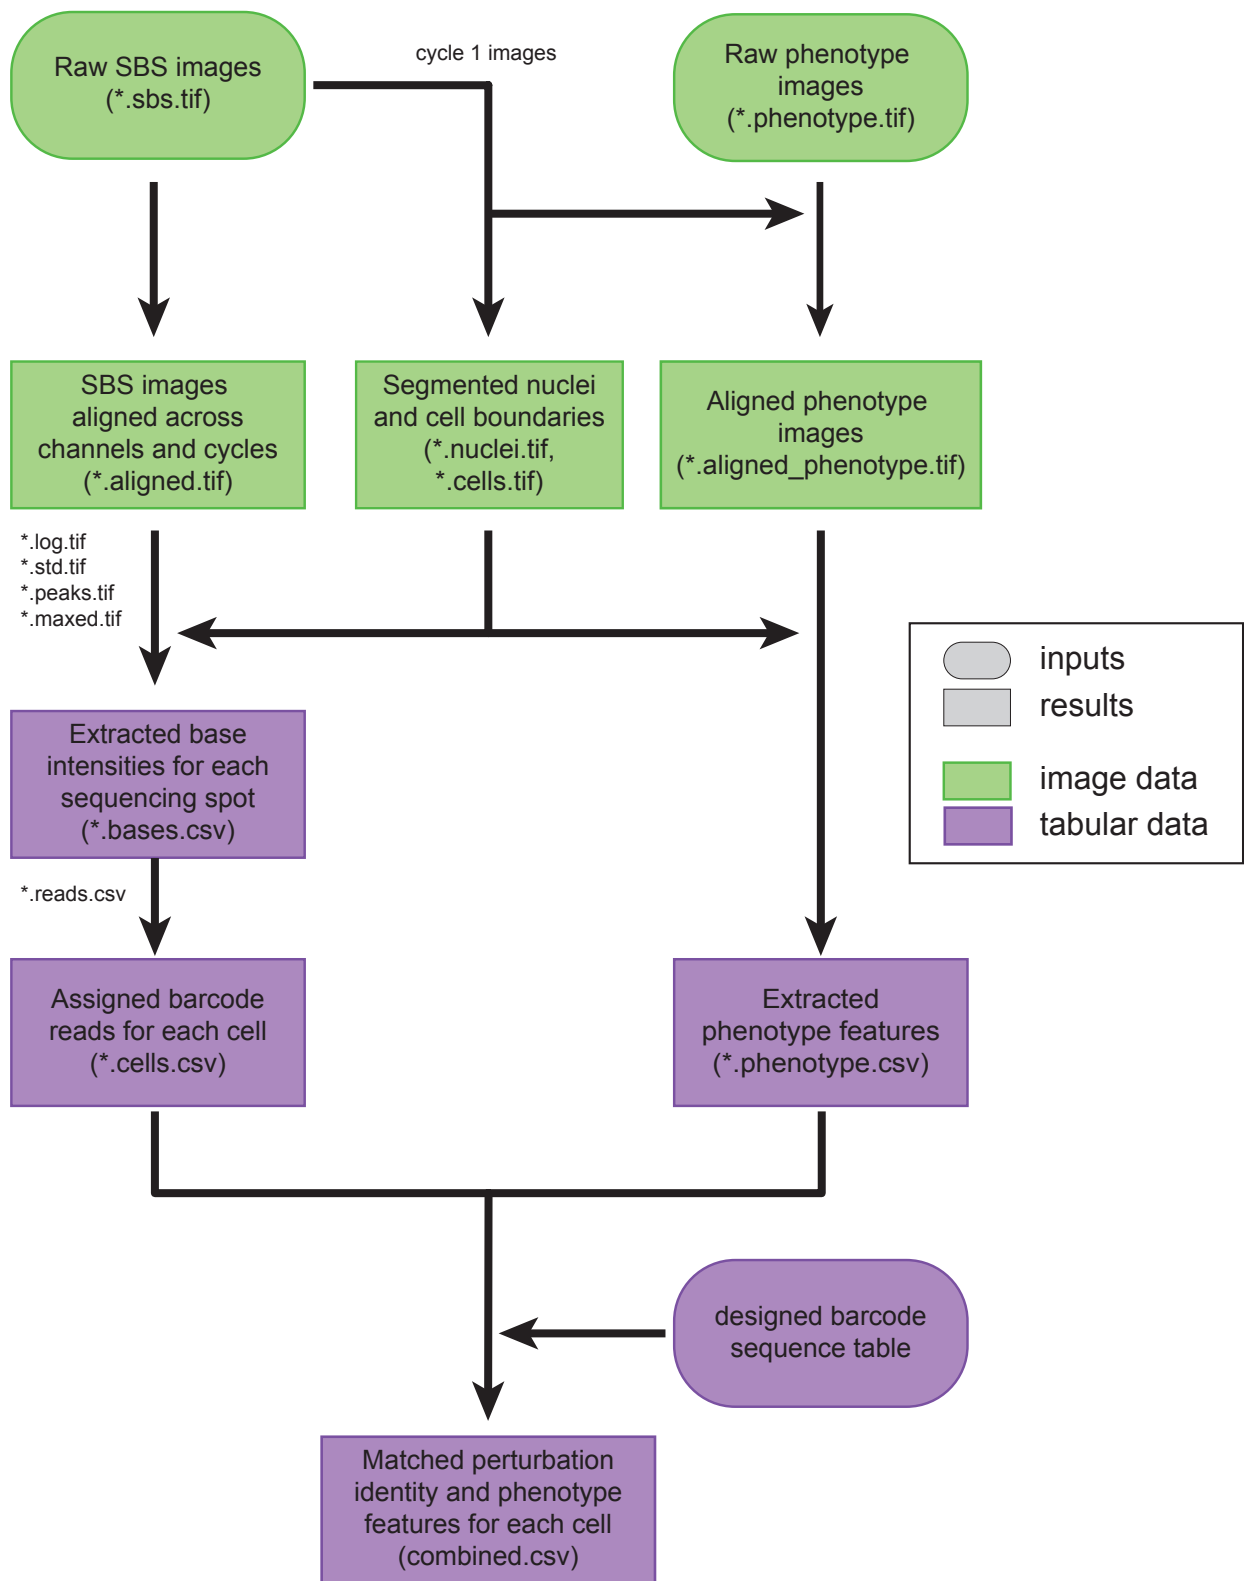

**Supplementary Figure 2.** Image analysis pipeline overview. Flowchart demonstrating the major steps of the screen processing pipeline. Input data are represented by rounded shapes; image and tabular data are in green and purple, respectively.
